# Supplementary material for: Phenology–soil moisture synchronisation and foliar boron regulate physiological resilience and yield stability of field pea (Pisum sativum L.) in rainfed rice-fallow systems
Source: Research Square preprint supplement (doi:10.21203/rs.3.rs-8849552/v1), 2026-02-18
Supplement: Supplementary file 1 [file fa68243fbc84cb769af14b31.docx]

**Phenology–soil moisture synchronisation and foliar boron regulate physiological resilience and yield stability of field pea (Pisum sativum L.) in rainfed rice-fallow systems**

**Supplementary Table S1:** Interactive effect of sowing dates and B concentration on plant boron content (ppm), pollen germination (%), and pollen viability (%) of field pea during 2017-18 and 2018-19 cropping season.

|  | Plant B (ppm) | | | Pollen viability (%) | | | Pollen germination (%) | | | |
| --- | --- | --- | --- | --- | --- | --- | --- | --- | --- | --- |
|  | **2017-18** | **2018-19** | **Pooled** | **2017-18** | **2018-19** | **Pooled** | **2017-18** | **2018-19** | **Pooled** |
| S1 B1 | 3.67c | 4.27ab | 3.63c | 80.10c | 81.17bcd | 80.63cd | 86.26b | 87.28b | 86.77b |
| S1 B2 | 3.56cd | 4.10b | 3.49cd | 83.77c | 83.90bc | 83.83bc | 93.40a | 93.63a | 93.52a |
| S1 B3 | 4.25a | 3.10efg | 4.31a | 88.33ab | 91.13a | 89.73a | 82.86bd | 83.70cd | 83.28c |
| S1 B4 | 4.13a | 4.19ab | 4.17a | 89.03c | 90.50a | 89.77a | 93.28a | 93.22a | 93.25a |
| S2 B1 | 3.93b | 4.50a | 3.93b | 80.27bc | 80.17cd | 80.22d | 83.07bcd | 82.71d | 82.89c |
| S2 B2 | 4.11a | 3.50cd | 4.13a | 84.27a | 85.53b | 84.90b | 93.51a | 92.33a | 92.92a |
| S2 B3 | 4.25a | 3.93b | 4.22a | 89.37de | 91.17a | 90.27a | 86.23bc | 86.34bc | 86.29b |
| S2 B4 | 4.24a | 4.13b | 4.26a | 88.53c | 90.20a | 89.37a | 93.60a | 93.97a | 93.79a |
| S3 B1 | 3.25fg | 3.60c | 3.18e | 68.63c | 69.73f | 69.18f | 82.21d | 81.04d | 81.63c |
| S3 B2 | 3.14gh | 3.43cde | 3.16ef | 71.00de | 72.83f | 71.92ef | 82.47d | 80.76d | 81.62c |
| S3 B3 | 3.34ef | 3.30cdef | 3.32de | 79.70c | 79.20cd | 79.45d | 77.93e | 75.94e | 76.93d |
| S3 B4 | 3.46de | 3.13ef | 3.48cd | 81.17c | 78.17de | 79.67d | 72.52f | 72.45f | 72.49e |
| S4 B1 | 2.85i | 3.01fg | 2.63h | 59.03f | 59.27g | 59.15h | 57.33i | 56.89h | 57.11h |
| S4 B2 | 3.03h | 3.17def | 2.91g | 62.63f | 63.23g | 62.93g | 63.42h | 63.44g | 63.43g |
| S4 B3 | 3.08h | 2.40h | 3.11f | 72.87de | 74.13ef | 73.50e | 69.06g | 69.32f | 69.19f |
| S4 B4 | 3.05h | 2.78g | 3.03fg | 73.87d | 73.87ef | 73.87e | 64.46g | 69.50f | 69.98f |
| S | <0.001 | <0.001 | <0.001 | <0.001 | <0.001 | <0.001 | <0.001 | <0.001 | <0.001 |
| B | <0.001 | <0.001 | <0.001 | <0.001 | <0.001 | <0.001 | <0.001 | <0.001 | <0.001 |
| S×B | <0.05 | <0.001 | <0.001 | NS | NS | NS | NS | NS | NS |

S1=10 November, S2=20 November, S3=30 November and S4=10 December; B1: no spray, B2: 0.1% boric acid, B3: 0.2% boric acid B4: 0.3% boric acid spray; Different lower-case letters within same columns are significantly different at p<0.05 according to Duncan multiple range test; NS = non-significant.

**Supplementary Table S2:** Interactive effect of sowing dates and B concentration on yield (kg ha-1) and yield attributing characters of field pea during 2017-18 and 2018-19 cropping season.

|  | Seed yield (kg ha-1) | | | Pods plant-1 | | | Seeds pod-1 | | |
| --- | --- | --- | --- | --- | --- | --- | --- | --- | --- |
| **2017-18** | **2018-19** | **Pooled** | **2017-18** | **2018-19** | **Pooled** | **2017-18** | **2018-19** | **Pooled** |
| S1 B1 | 1253f | 1280f | 1266f | 10.82bc | 10.87bc | 15.33a | 3.71de | 3.76de | 3.73de |
| S1 B1 | 1383d | 1413d | 1398d | 11.82b | 11.70b | 15.05a | 4.15bcd | 4.20bcd | 4.18bcd |
| S1 B3 | 1491bc | 1523bc | 1507bc | 14.54a | 15.25a | 14.89a | 4.43b | 4.48b | 4.46b |
| S1 B4 | 1474c | 1506c | 1490c | 14.37a | 14.77a | 14.57a | 4.07bcd | 4.13bcd | 4.10bcd |
| S2 B1 | 1334e | 1363e | 1348e | 10.94bc | 11.27b | 11.76b | 3.73de | 3.78de | 3.76de |
| S2 B2 | 1476c | 1507c | 1491c | 11.40b | 11.72b | 11.56b | 4.87a | 4.93a | 4.90a |
| S2 B3 | 1557a | 1590a | 1574a | 15.10a | 15.56a | 11.10b | 4.38b | 4.44b | 4.41b |
| S2 B4 | 1529ab | 1562ab | 1546ab | 14.92a | 15.17a | 10.85bc | 4.35b | 4.41b | 4.38b |
| S3 B1 | 962h | 983h | 973h | 8.01de | 8.25de | 10.11c | 3.52ef | 3.56ef | 3.54ef |
| S3 B2 | 1087g | 1110g | 1099g | 8.83d | 8.94d | 9.96c | 3.87cde | 3.91 | 3.89cde |
| S3 B3 | 1285f | 1313f | 1299f | 9.92c | 10.01c | 8.97d | 4.28bc | 4.34bc | 4.31bc |
| S3 B4 | 1254f | 1281f | 1267f | 10.02c | 10.20c | 8.89d | 4.11bcd | 4.16bcd | 4.13bcd |
| S4 B1 | 630k | 644k | 637k | 6.01f | 6.21f | 8.82d | 2.78h | 2.81h | 2.79h |
| S4 B2 | 757j | 773j | 765j | 7.35e | 7.59e | 8.13de | 2.97gh | 2.80gh | 2.78gh |
| S4 B3 | 878i | 897i | 888i | 8.88d | 9.06d | 7.47e | 3.20fg | 3.01gh | 2.99gh |
| S4 B4 | 863i | 882i | 872i | 8.71d | 8.94d | 6.11f | 2.77gh | 3.24fg | 3.22fg |

S1=10 November, S2=20 November, S3=30 November and S4=10 December; B1: no spray, B2: 0.1% boric acid, B3: 0.2% boric acid B4: 0.3% boric acid spray; Different lower-case letters within same columns are significantly different at p<0.05 according to Duncan multiple range test; NS = non-significant.

**Supplementary Fig. 1.** Relationship between Relative leaf water content and proline content with root zone soil moisture storage.

**Supplementary Fig. S2.** Relationship between photosynthetic rate and leaf area index.


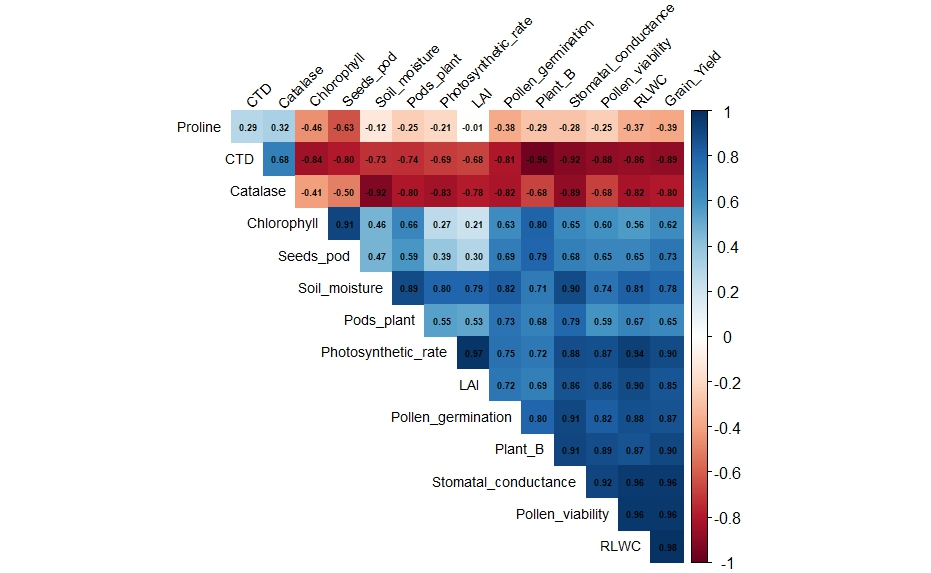


**Supplementary Fig. S3.** Correlation plot of physiological and reproductive traits.
